# Supplementary material for: Identification of gene expression predictors of occupational benzene exposure
Source: PLOS journal article supplement (doi:10.1371/journal.pone.0205427), 2018-10-09

## POS control Pearson correlation ( $R^2$ )

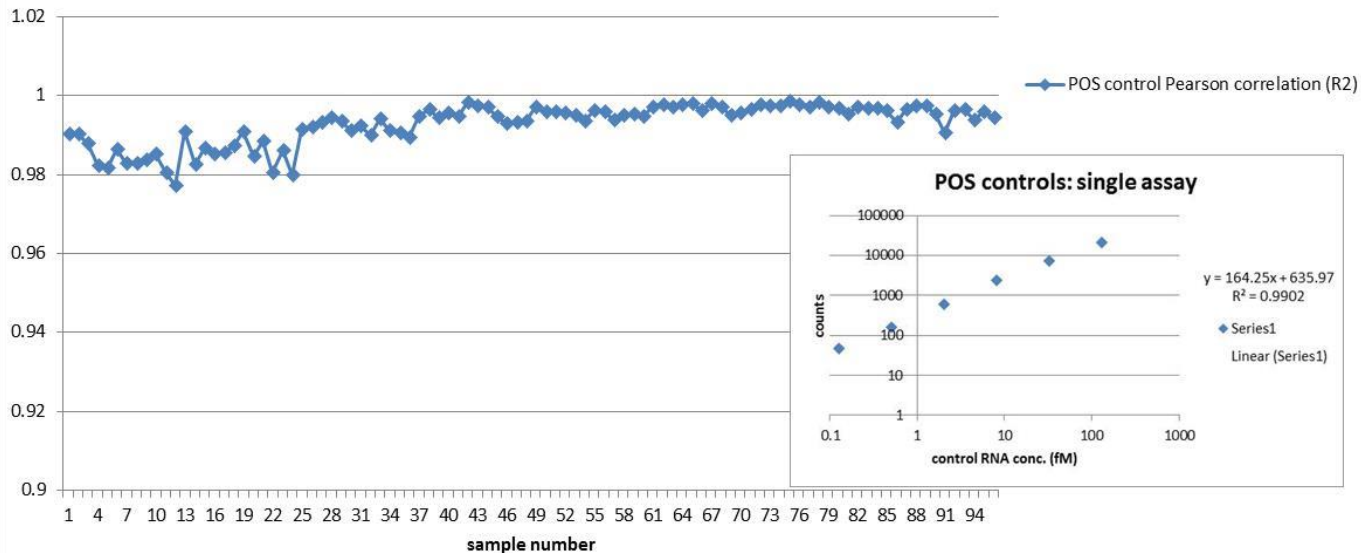

Supplement: S1 (10.1371/journal.pone.0205427.s001) [file journal.pone.0205427.s001]
